# Supplementary material for: Switching from an electride-like molecule to the molecular electride K-F6C6H6 driven by an oriented external electric field
Source: Royal Society of Chemistry journal article supplement (doi:10.1039/d0cp05878e), 2020-12-15
Supplement: d0cp05878e1.pdf [file d0cp05878e1.pdf]

## Switching from Electride-like Molecule to Molecular Electride K- F<sub>6</sub>C<sub>6</sub>H<sub>6</sub> Driven by Oriented External Electric Field

Yin-Feng Wang,<sup>\*a</sup> Tian Qin,<sup>a</sup> Jia-Jun Wang,<sup>\*b</sup> Xue-Xia Liu,<sup>a</sup> Zhi-Jun Wang,<sup>a</sup> Jianguan Huang,<sup>a</sup> Jia Li,<sup>a</sup>  
and Zhi-Ru Li<sup>\*c</sup>

---

<sup>a</sup>Jiangxi Province Key Laboratory of Coordination Chemistry, School of Chemistry and Chemical Engineering, Jinggangshan University,

Ji'an, Jiangxi 343009 (P.R. China). E-mail: [cyclont@yeah.net](mailto:cyclont@yeah.net)

<sup>b</sup>Key Laboratory of Preparation and Application of Environmental Friendly Materials, Ministry of Education, Jilin Normal University,

Changchun, Jilin 130103 (P.R. China). E-mail: [jjjunwang@jlnu.edu.cn](mailto:jjjunwang@jlnu.edu.cn)

<sup>c</sup>Institute of Theoretical Chemistry, Jilin University, Changchun 130023 (P.R. China) E-mail: [lzr@jlu.edu.cn](mailto:lzr@jlu.edu.cn)

## Contents

|                                                                                                                                                                                                                                                                                                                                                                                                                                                              |     |
|--------------------------------------------------------------------------------------------------------------------------------------------------------------------------------------------------------------------------------------------------------------------------------------------------------------------------------------------------------------------------------------------------------------------------------------------------------------|-----|
| Optimized Cartesian coordinates for K-F <sub>6</sub> C <sub>6</sub> H <sub>6</sub> at the MP2/6-311+G(d,p) level with and without OEEF .....                                                                                                                                                                                                                                                                                                                 | S3  |
| <b>Table S1.</b> C-F bond lengths ( $B_{C-F}$ , in Å) and NPA charges of M ( $Q_M$ , in  e ) in M@F <sub>6</sub> C <sub>6</sub> H <sub>6</sub> (M= Li, Na, K) with increasing external electric field strength ( $F_z$ , $\times 10^{-4}$ a.u.).....                                                                                                                                                                                                         | S5  |
| <b>Table S2.</b> Total energy ( $E_{tot}$ , au), relative energy ( $E_{rel}$ , kcal/mol), Interaction energy ( $E_{int}$ , kcal/mol), energies of HOMOs ( $\epsilon_{HOMO}$ , in eV), and HOMO-LUMO gaps ( $\epsilon_{gap}$ , in eV), vertical ionization energy (VIE, in eV), and electron tunneling ionization ( $\omega$ , s <sup>-1</sup> ) of K-F <sub>6</sub> C <sub>6</sub> H <sub>6</sub> with respect to OEEF ( $F_z$ , $\times 10^{-4}$ au).....   | S6  |
| <b>Table S3.</b> Total energy ( $E_{tot}$ , au), relative energy ( $E_{rel}$ , kcal/mol), Interaction energy ( $E_{int}$ , kcal/mol), energies of HOMOs ( $\epsilon_{HOMO}$ , in eV), and HOMO-LUMO gaps ( $\epsilon_{gap}$ , in eV), vertical ionization energy (VIE, in eV), and electron tunnelling ionization ( $\omega$ , s <sup>-1</sup> ) of Li-F <sub>6</sub> C <sub>6</sub> H <sub>6</sub> with respect to OEEF ( $F_z$ , $\times 10^{-4}$ au)..... | S7  |
| <b>Table S4.</b> Total energy ( $E_{tot}$ , au), relative energy ( $E_{rel}$ , kcal/mol), Interaction energy ( $E_{int}$ , kcal/mol), energies of HOMOs ( $\epsilon_{HOMO}$ , in eV), and HOMO-LUMO gaps ( $\epsilon_{gap}$ , in eV), vertical ionization energy (VIE, in eV), and electron tunnelling ionization ( $\omega$ , s <sup>-1</sup> ) of Na-F <sub>6</sub> C <sub>6</sub> H <sub>6</sub> with respect to OEEF ( $F_z$ , $\times 10^{-4}$ au)..... | S8  |
| <b>Fig. S1.</b> Spin density maps of K-F <sub>6</sub> C <sub>6</sub> H <sub>6</sub> . (a) for <b>1</b> , (b) for <b>2</b> , (c) for <b>3</b> , (d) for <b>4</b> .....                                                                                                                                                                                                                                                                                        | S9  |
| <b>Fig. S2.</b> ELF, LOL, and NCI maps for Li-F <sub>6</sub> C <sub>6</sub> H <sub>6</sub> optimized in presence of OEEF. (a) for <b>1</b> ( $F_z = -0.0050$ ), (b) for <b>2</b> ( $F_z = 0$ ), (c) for <b>3</b> ( $F_z = 0.0050$ ), (d) for <b>4</b> ( $F_z = 0.0080$ ).....                                                                                                                                                                                | S10 |
| <b>Fig. S3.</b> ELF, LOL, and NCI maps for Na-F <sub>6</sub> C <sub>6</sub> H <sub>6</sub> optimized in presence of OEEF. (a) for <b>1</b> ( $F_z = -0.0050$ ), (b) for <b>2</b> ( $F_z = 0$ ), (c) for <b>3</b> ( $F_z = 0.0035$ ), (d) for <b>4</b> ( $F_z = 0.0070$ ).....                                                                                                                                                                                | S11 |
| <b>Fig. S4.</b> QTAIM topological analysis and corresponding basin representations of Li-F <sub>6</sub> C <sub>6</sub> H <sub>6</sub> ·e <sup>-</sup> (a, $F_z = 0.0080$ ) and Na-F <sub>6</sub> C <sub>6</sub> H <sub>6</sub> (b, $F_z = 0.0070$ a. u.).....                                                                                                                                                                                                | S12 |

**1** K-F<sub>6</sub>C<sub>6</sub>H<sub>6</sub> in presence of  $F_z = -0.0050$  a.u.

|   |             |             |             |
|---|-------------|-------------|-------------|
| C | 1.24697476  | 0.66547996  | -1.31793531 |
| C | -1.24697411 | 0.66547898  | -1.31793513 |
| C | -0.00000006 | -1.49263175 | -1.22552652 |
| C | 0.00000030  | 1.43239708  | -0.89849111 |
| C | 1.27166788  | -0.76817414 | -0.80499412 |
| C | -1.27166886 | -0.76817502 | -0.80499387 |
| K | -0.00000027 | 0.11576614  | 2.86378142  |
| F | 2.36562912  | 1.33056448  | -0.86690618 |
| F | 0.00000021  | 1.60622740  | 0.48457302  |
| F | 1.37231170  | -0.76709372 | 0.58528717  |
| F | -2.36562805 | 1.33056371  | -0.86690600 |
| F | -0.00000004 | -2.76253498 | -0.69126230 |
| F | -1.37231212 | -0.76709399 | 0.58528762  |
| H | 0.00000026  | 2.43148167  | -1.34117305 |
| H | 2.15229840  | -1.29307505 | -1.18328992 |
| H | 1.28175731  | 0.63893494  | -2.41519395 |
| H | -1.28175681 | 0.63893421  | -2.41519372 |
| H | -0.00000002 | -1.58037950 | -2.32009429 |
| H | -2.15229958 | -1.29307549 | -1.18328989 |

**2** field-free K-F<sub>6</sub>C<sub>6</sub>H<sub>6</sub>

|   |             |             |             |
|---|-------------|-------------|-------------|
| C | 0.66216861  | -1.32152344 | 1.24208816  |
| C | 0.66216861  | -1.32152344 | -1.24208816 |
| C | -1.48729516 | -1.23060891 | 0.00000000  |
| C | 1.43221990  | -0.89230857 | -0.00000000 |
| C | -0.76836784 | -0.79933186 | 1.27166289  |
| C | -0.76836784 | -0.79933186 | -1.27166289 |
| K | 0.12588775  | 3.00935344  | 0.00000000  |
| F | 1.33230949  | -0.90698097 | 2.37145402  |
| F | 1.60707508  | 0.48173815  | -0.00000000 |
| F | -0.76836784 | 0.58210212  | 1.37283347  |
| F | 1.33230949  | -0.90698097 | -2.37145402 |
| F | -2.77148405 | -0.73335129 | -0.00000000 |
| F | -0.76836784 | 0.58210212  | -1.37283347 |
| H | 2.42931215  | -1.34163264 | -0.00000000 |
| H | -1.29269410 | -1.18441455 | 2.15079587  |
| H | 0.62381362  | -2.41969489 | 1.25600140  |
| H | 0.62381362  | -2.41969489 | -1.25600140 |
| H | -1.54984498 | -2.32775783 | 0.00000000  |
| H | -1.29269410 | -1.18441455 | -2.15079587 |

**3** K-F<sub>6</sub>C<sub>6</sub>H<sub>6</sub> in presence of  $F_z = 0.0030$  a.u.

|   |             |             |             |
|---|-------------|-------------|-------------|
| C | 1.23216925  | 0.65782825  | -1.29229631 |
| C | -1.23222138 | 0.65793012  | -1.29217960 |
| C | 0.00006408  | -1.47529155 | -1.20184492 |
| C | 0.00004130  | 1.42820051  | -0.87891962 |
| C | 1.26764602  | -0.76542198 | -0.78659772 |
| C | -1.26757833 | -0.76543128 | -0.78678478 |
| K | -0.00011362 | 0.10822439  | 2.62464269  |
| F | 2.36676873  | 1.33089688  | -0.87794236 |
| F | 0.00005664  | 1.65185352  | 0.51792148  |
| F | 1.40927905  | -0.78774479 | 0.62061121  |
| F | -2.36674364 | 1.33089698  | -0.87747204 |
| F | 0.00000018  | -2.76479281 | -0.70299112 |
| F | -1.40933221 | -0.78783955 | 0.62039842  |
| H | 0.00007646  | 2.42099297  | -1.33898309 |
| H | 2.14379581  | -1.28836810 | -1.18151918 |
| H | 1.23276642  | 0.61199181  | -2.40315639 |
| H | -1.23310159 | 0.61228147  | -2.40304666 |
| H | 0.00009332  | -1.52422472 | -2.31224877 |
| H | -2.14366648 | -1.28838717 | -1.18184741 |

**4** K-F<sub>6</sub>C<sub>6</sub>H<sub>6</sub> in presence of  $F_z = 0.0050$  a.u.

|   |             |             |             |
|---|-------------|-------------|-------------|
| C | 1.24697476  | 0.66547996  | -1.31793531 |
| C | -1.24697411 | 0.66547898  | -1.31793513 |
| C | -0.00000006 | -1.49263175 | -1.22552652 |
| C | 0.00000030  | 1.43239708  | -0.89849111 |
| C | 1.27166788  | -0.76817414 | -0.80499412 |
| C | -1.27166886 | -0.76817502 | -0.80499387 |
| K | -0.00000027 | 0.11576614  | 2.86378142  |
| F | 2.36562912  | 1.33056448  | -0.86690618 |
| F | 0.00000021  | 1.60622740  | 0.48457302  |
| F | 1.37231170  | -0.76709372 | 0.58528717  |
| F | -2.36562805 | 1.33056371  | -0.86690600 |
| F | -0.00000004 | -2.76253498 | -0.69126230 |
| F | -1.37231212 | -0.76709399 | 0.58528762  |
| H | 0.00000026  | 2.43148167  | -1.34117305 |
| H | 2.15229840  | -1.29307505 | -1.18328992 |
| H | 1.28175731  | 0.63893494  | -2.41519395 |
| H | -1.28175681 | 0.63893421  | -2.41519372 |
| H | -0.00000002 | -1.58037950 | -2.32009429 |
| H | -2.15229958 | -1.29307549 | -1.18328989 |

**Table S1.** C-F bond lengths ( $B_{C-F}$ , in Å) and NPA charges of M ( $Q_M$ , in |e|) in  $M@F_6C_6H_6$  (M= Li, Na, K) with increasing external electric field strength ( $F_z$ ,  $\times 10^{-4}$  a.u.).

| Field | Li- $F_6C_6H_6$ |          | Na- $F_6C_6H_6$ |          | K- $F_6C_6H_6$ |       |
|-------|-----------------|----------|-----------------|----------|----------------|-------|
|       | $B_{C-F}$       | $Q_{Li}$ | $B_{C-F}$       | $Q_{Na}$ | $B_{C-F}$      | $Q_K$ |
| -55   |                 |          | 2.545           | 0.043    | 2.789          | 0.034 |
| -50   | 2.096           | 0.057    | 2.537           | 0.043    | 2.803          | 0.035 |
| -45   | 2.104           | 0.057    | 2.550           | 0.044    | 2.815          | 0.036 |
| -40   | 2.110           | 0.057    | 2.565           | 0.043    | 2.828          | 0.037 |
| -35   | 2.117           | 0.057    | 2.580           | 0.043    | 2.840          | 0.038 |
| -30   | 2.123           | 0.056    | 2.596           | 0.043    | 2.853          | 0.039 |
| -25   | 2.130           | 0.056    | 2.612           | 0.007    | 2.891          | 0.039 |
| -20   | 2.136           | 0.055    | 2.630           | 0.041    | 2.878          | 0.040 |
| -15   | 2.142           | 0.054    | 2.650           | 0.040    | 2.891          | 0.041 |
| -10   | 2.147           | 0.053    | 2.672           | 0.039    | 2.905          | 0.040 |
| -5    | 2.154           | 0.052    | 2.699           | 0.038    | 2.917          | 0.040 |
| 0     | 2.154           | 0.051    | 2.727           | 0.036    | 2.928          | 0.039 |
| 5     | 2.155           | 0.050    | 2.764           | 0.034    | 2.940          | 0.038 |
| 10    | 2.156           | 0.049    | 2.809           | 0.031    | 2.950          | 0.036 |
| 15    | 2.159           | 0.048    | 2.875           | 0.028    | 2.950          | 0.034 |
| 20    | -               | -        | -               | -        | 2.929          | 0.032 |
| 25    | 2.100           | 0.332    | -               | -        | 2.950          | 0.035 |
| 30    | 2.162           | 0.312    | -               | -        | 2.609          | 0.890 |
| 35    | 1.900           | 0.911    | 3.557           | 0.008    | 2.615          | 0.898 |
| 40    | 1.903           | 0.912    | 2.628           | 0.339    | 2.624          | 0.904 |
| 45    | 1.907           | 0.913    | 2.748           | 0.330    | 2.631          | 0.909 |
| 50    | 1.910           | 0.913    | 2.325           | 0.932    | 2.639          | 0.912 |
| 55    | 1.914           | 0.914    | 2.330           | 0.935    | 2.649          | 0.915 |
| 60    | 1.918           | 0.913    | 2.337           | 0.938    | 2.658          | 0.918 |
| 65    | 1.922           | 0.913    | 2.344           | 0.940    | 2.668          | 0.917 |
| 70    | 1.926           | 0.913    | 2.351           | 0.942    | 2.678          | 0.922 |
| 80    | 1.935           | 0.913    | 2.367           | 0.945    | 2.701          | 0.925 |
| 90    | 1.944           | 0.913    | 2.384           | 0.947    | 2.727          | 0.928 |
| 100   | 1.955           | 0.910    | 2.404           | 0.950    |                |       |

**Table S2.** Total energy ( $E_{\text{tot}}$ , au), relative energy ( $E_{\text{rel}}$ , kcal/mol), Interaction energy ( $E_{\text{int}}$ , kcal/mol), energies of HOMOs ( $\epsilon_{\text{HOMO}}$ , in eV), and HOMO-LUMO gaps ( $\epsilon_{\text{gap}}$ , in eV), vertical ionization energy (VIE, in eV), and electron tunneling ionization ( $\omega$ ,  $\text{s}^{-1}$ ) of  $\text{K-F}_6\text{C}_6\text{H}_6$  with respect to OEEF ( $F_z, \times 10^{-4}$  au).

| Field | $E_{\text{tot}}$ | $E_{\text{rel}}$ | $E_{\text{int}}$ | $\epsilon_{\text{HOMO}}$ | $\epsilon_{\text{gap}}$ | VIE   | $\omega$               |
|-------|------------------|------------------|------------------|--------------------------|-------------------------|-------|------------------------|
| -55   | -1429.1866       | -20.18           | -11.45           | -0.151                   | 2.684                   | 4.207 | $1.37 \times 10^9$     |
| -50   | -1429.1830       | -17.91           | -10.57           | -0.146                   | 2.747                   | 4.103 | $4.11 \times 10^8$     |
| -45   | -1429.1795       | -15.75           | -9.72            | -0.142                   | 2.816                   | 4.002 | $9.11 \times 10^7$     |
| -40   | -1429.1762       | -13.67           | -8.91            | -0.138                   | 2.891                   | 3.902 | $1.34 \times 10^7$     |
| -35   | -1429.1731       | -11.69           | -8.12            | -0.134                   | 2.970                   | 3.806 | $1.09 \times 10^6$     |
| -30   | -1429.1700       | -9.79            | -7.36            | -0.131                   | 3.053                   | 3.712 | $3.68 \times 10^4$     |
| -25   | -1429.1671       | -7.95            | -6.57            | -0.128                   | 3.148                   | 3.640 | $2.24 \times 10^2$     |
| -20   | -1429.1644       | -6.23            | -5.88            | -0.123                   | 3.216                   | 3.529 | $2.06 \times 10^{-1}$  |
| -15   | -1429.1617       | -4.56            | -5.18            | -0.120                   | 3.245                   | 3.441 | $9.75 \times 10^{-7}$  |
| -10   | -1429.1592       | -2.97            | -4.49            | -0.116                   | 3.140                   | 3.354 | $1.77 \times 10^{-17}$ |
| -5    | -1429.1567       | -1.45            | -3.81            | -0.113                   | 2.998                   | 3.269 | $5.73 \times 10^{-50}$ |
| 0     | -1429.1544       | 0.00             | -3.15            | -0.109                   | 2.849                   | 3.186 |                        |
| 5     | -1429.1523       | 1.37             | -2.51            | -0.106                   | 2.696                   | 3.104 | $6.43 \times 10^{-45}$ |
| 10    | -1429.1502       | 2.66             | -1.89            | -0.102                   | 2.539                   | 3.023 | $1.80 \times 10^{-12}$ |
| 15    | -1429.1483       | 3.86             | -1.31            | -0.099                   | 2.375                   | 2.941 | $9.34 \times 10^{-2}$  |
| 20    | -1429.1466       | 4.95             | -0.78            | -0.095                   | 2.194                   | 2.853 | $2.01 \times 10^4$     |
| 25    | -1429.1451       | 5.84             | -0.41            | -0.092                   | 2.039                   | 2.790 | $2.15 \times 10^7$     |
| 30    | -1429.1514       | 1.93             | -6.69            | -0.105                   | 2.727                   | 2.954 | $2.03 \times 10^8$     |
| 35    | -1429.1548       | -0.25            | -9.13            | -0.108                   | 2.889                   | 3.018 | $2.41 \times 10^9$     |
| 40    | -1429.1584       | -2.50            | -11.66           | -0.111                   | 3.048                   | 3.087 | $1.48 \times 10^{10}$  |
| 45    | -1429.1621       | -4.83            | -14.14           | -0.114                   | 3.201                   | 3.157 | $5.95 \times 10^{10}$  |
| 50    | -1429.1660       | -7.23            | -16.66           | -0.117                   | 3.338                   | 3.230 | $1.77 \times 10^{11}$  |
| 55    | -1429.1699       | -9.69            | -19.16           | -0.120                   | 3.438                   | 3.304 | $4.23 \times 10^{11}$  |
| 60    | -1429.1739       | -12.21           | -21.71           | -0.124                   | 3.507                   | 3.383 | $8.57 \times 10^{11}$  |
| 65    | -1429.1739       | -12.20           | -21.58           | -0.123                   | 3.503                   | 3.348 | $2.70 \times 10^{12}$  |
| 70    | -1429.1822       | -17.42           | -26.64           | -0.130                   | 3.619                   | 3.540 | $2.55 \times 10^{12}$  |
| 80    | -1429.1909       | -22.86           | -31.39           | -0.137                   | 3.730                   | 3.703 | $5.60 \times 10^{12}$  |
| 90    | -1429.1999       | -28.50           | -35.73           | -0.143                   | 3.846                   | 3.871 | $1.11 \times 10^{13}$  |

**Table S3.** Total energy ( $E_{\text{tot}}$ , au), relative energy ( $E_{\text{rel}}$ , kcal/mol), Interaction energy ( $E_{\text{int}}$ , kcal/mol), energies of HOMOs ( $\epsilon_{\text{HOMO}}$ , in eV), and HOMO-LUMO gaps ( $\epsilon_{\text{gap}}$ , in eV), vertical ionization energy (VIE, in eV), and electron tunneling ionization ( $\omega$ ,  $\text{s}^{-1}$ ) of Li-F<sub>6</sub>C<sub>6</sub>H<sub>6</sub> with respect to OEEF ( $F_z$ ,  $\times 10^{-4}$  au).

| Field | $E_{\text{tot}}$ | $E_{\text{rel}}$ | $E_{\text{int}}$ | $\epsilon_{\text{HOMO}}$ | $\epsilon_{\text{gap}}$ | VIE   | $\omega$               |
|-------|------------------|------------------|------------------|--------------------------|-------------------------|-------|------------------------|
| -45   | -837.2796        | -15.89           | -11.78           | -0.150                   | 3.619                   | 4.132 | $3.09 \times 10^7$     |
| -40   | -837.2765        | -13.93           | -10.89           | -0.147                   | 3.697                   | 4.052 | $3.35 \times 10^6$     |
| -35   | -837.2734        | -12.03           | -10.02           | -0.144                   | 3.776                   | 3.974 | $1.85 \times 10^5$     |
| -30   | -837.2705        | -10.17           | -9.17            | -0.142                   | 3.845                   | 3.897 | $3.77 \times 10^3$     |
| -25   | -837.2676        | -8.36            | -8.33            | -0.139                   | 3.853                   | 3.820 | $1.57 \times 10^1$     |
| -20   | -837.2648        | -6.60            | -7.49            | -0.136                   | 3.760                   | 3.744 | $4.01 \times 10^{-3}$  |
| -15   | -837.2621        | -4.88            | -6.66            | -0.133                   | 3.639                   | 3.669 | $3.81 \times 10^{-9}$  |
| -10   | -837.2594        | -3.21            | -5.84            | -0.130                   | 3.510                   | 3.593 | $2.91 \times 10^{-21}$ |
| -5    | -837.2568        | -1.58            | -5.02            | -0.127                   | 3.382                   | 3.523 | $5.70 \times 10^{-58}$ |
| 0     | -837.2543        | 0.00             | -4.22            | -0.124                   | 3.237                   | 3.443 |                        |
| 5     | -837.2518        | 1.53             | -3.43            | -0.121                   | 3.089                   | 3.365 | $5.79 \times 10^{-53}$ |
| 10    | -837.2495        | 3.01             | -2.66            | -0.118                   | 2.939                   | 3.289 | $1.79 \times 10^{-16}$ |
| 15    | -837.2472        | 4.43             | -1.92            | -0.114                   | 2.764                   | 3.201 | $2.71 \times 10^{-4}$  |
| 25    | -837.2471        | 4.50             | -3.35            | -0.101                   | 2.146                   | 3.151 | $2.04 \times 10^5$     |
| 30    | -837.2452        | 5.70             | -2.49            | -0.101                   | 2.146                   | 3.141 | $2.70 \times 10^7$     |
| 35    | -837.2574        | -1.93            | -14.37           | -0.122                   | 3.479                   | 3.440 | $4.46 \times 10^7$     |
| 40    | -837.2596        | -3.34            | -15.99           | -0.124                   | 3.599                   | 3.482 | $5.62 \times 10^8$     |
| 45    | -837.2620        | -4.83            | -17.71           | -0.127                   | 3.718                   | 3.529 | $3.87 \times 10^9$     |
| 50    | -837.2644        | -6.38            | -19.45           | -0.129                   | 3.832                   | 3.577 | $1.77 \times 10^{10}$  |
| 55    | -837.2671        | -8.02            | -21.33           | -0.131                   | 3.945                   | 3.634 | $5.81 \times 10^{10}$  |
| 60    | -837.2697        | -9.70            | -23.18           | -0.134                   | 4.043                   | 3.689 | $1.57 \times 10^{11}$  |
| 65    | -837.2725        | -11.45           | -25.08           | -0.136                   | 4.127                   | 3.749 | $3.54 \times 10^{11}$  |
| 70    | -837.2754        | -13.27           | -27.08           | -0.139                   | 4.175                   | 3.814 | $6.92 \times 10^{11}$  |
| 80    | -837.2814        | -17.02           | -31.02           | -0.145                   | 4.221                   | 3.942 | $2.05 \times 10^{12}$  |
| 90    | -837.2878        | -21.01           | -35.09           | -0.150                   | 4.267                   | 4.082 | $4.53 \times 10^{12}$  |

**Table S4.** Total energy ( $E_{\text{tot}}$ , au), relative energy ( $E_{\text{rel}}$ , kcal/mol), Interaction energy ( $E_{\text{int}}$ , kcal/mol), energies of HOMOs ( $\epsilon_{\text{HOMO}}$ , in eV), and HOMO-LUMO gaps ( $\epsilon_{\text{gap}}$ , in eV), vertical ionization energy (VIE, in eV), and electron tunneling ionization ( $\omega$ ,  $\text{s}^{-1}$ ) of Na-F<sub>6</sub>C<sub>6</sub>H<sub>6</sub> with respect to OEEF ( $F_z, \times 10^{-4}$  au).

| Field | $E_{\text{tot}}$ | $E_{\text{rel}}$ | $E_{\text{int}}$ | $\epsilon_{\text{HOMO}}$ | $\epsilon_{\text{gap}}$ | VIE   | $\omega$               |
|-------|------------------|------------------|------------------|--------------------------|-------------------------|-------|------------------------|
| -55   | -991.6934        | -18.37           | -9.10            | -0.164                   | 3.383                   | 4.605 |                        |
| -50   | -991.6903        | -16.40           | -8.33            | -0.161                   | 3.464                   | 4.502 | $1.92 \times 10^7$     |
| -45   | -991.6873        | -14.50           | -7.59            | -0.158                   | 3.547                   | 4.403 | $3.03 \times 10^6$     |
| -40   | -991.6844        | -12.67           | -6.87            | -0.155                   | 3.634                   | 4.310 | $2.82 \times 10^5$     |
| -35   | -991.6815        | -10.89           | -6.16            | -0.152                   | 3.722                   | 4.219 | $1.27 \times 10^4$     |
| -30   | -991.6788        | -9.17            | -5.47            | -0.149                   | 3.811                   | 4.133 | $1.89 \times 10^2$     |
| -25   | -991.6702        | -3.80            | -1.87            | -0.182                   | -9.470                  | 4.979 | $1.18 \times 10^{-7}$  |
| -20   | -991.6736        | -5.89            | -4.13            | -0.143                   | 3.962                   | 3.968 | $5.86 \times 10^{-5}$  |
| -15   | -991.6711        | -4.34            | -3.48            | -0.140                   | 3.943                   | 3.890 | $1.46 \times 10^{-11}$ |
| -10   | -991.6687        | -2.84            | -2.85            | -0.138                   | 3.851                   | 3.815 | $6.91 \times 10^{-25}$ |
| -5    | -991.6664        | -1.39            | -2.23            | -0.135                   | 3.741                   | 3.744 | $3.28 \times 10^{-65}$ |
| 0     | -991.6642        | 0.00             | -1.62            | -0.133                   | 3.625                   | 3.676 |                        |
| 5     | -991.6620        | 1.33             | -1.03            | -0.130                   | 3.512                   | 3.614 | $6.13 \times 10^{-61}$ |
| 10    | -991.6600        | 2.60             | -0.47            | -0.128                   | 3.404                   | 3.558 | $1.06 \times 10^{-20}$ |
| 15    | -991.6581        | 3.80             | 0.06             | -0.127                   | 3.312                   | 3.516 | $1.61 \times 10^{-7}$  |
| 35    | -991.6523        | 7.48             | 1.20             | -0.125                   | 3.121                   | 3.467 | $3.44 \times 10^7$     |
| 40    | -991.6516        | 7.86             | 1.37             | -0.099                   | 1.983                   | 3.049 | $1.99 \times 10^{10}$  |
| 45    | -991.6507        | 8.43             | 1.57             | -0.100                   | 1.953                   | 3.044 | $1.31 \times 10^{11}$  |
| 50    | -991.6626        | 0.97             | -7.83            | -0.121                   | 3.228                   | 3.309 | $1.06 \times 10^{11}$  |
| 55    | -991.6661        | -1.23            | -10.27           | -0.123                   | 3.371                   | 3.375 | $2.80 \times 10^{11}$  |
| 60    | -991.6697        | -3.49            | -12.77           | -0.126                   | 3.515                   | 3.446 | $6.10 \times 10^{11}$  |
| 65    | -991.6734        | -5.79            | -15.27           | -0.129                   | 3.660                   | 3.517 | $1.17 \times 10^{12}$  |
| 70    | -991.6772        | -8.16            | -17.78           | -0.132                   | 3.801                   | 3.590 | $2.02 \times 10^{12}$  |
| 80    | -991.6849        | -13.04           | -22.81           | -0.138                   | 4.079                   | 3.742 | $4.78 \times 10^{12}$  |
| 90    | -991.6930        | -18.11           | -27.82           | -0.144                   | 4.197                   | 3.899 | $9.07 \times 10^{12}$  |



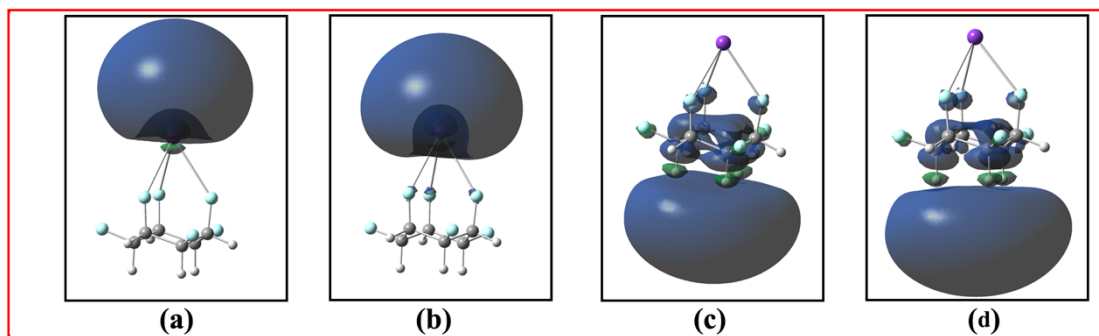

**Fig. S1.** Spin density maps of K-F<sub>6</sub>C<sub>6</sub>H<sub>6</sub>. (a) for **4**, (b) for **1**, (c) for **2**, (d) for **3**.

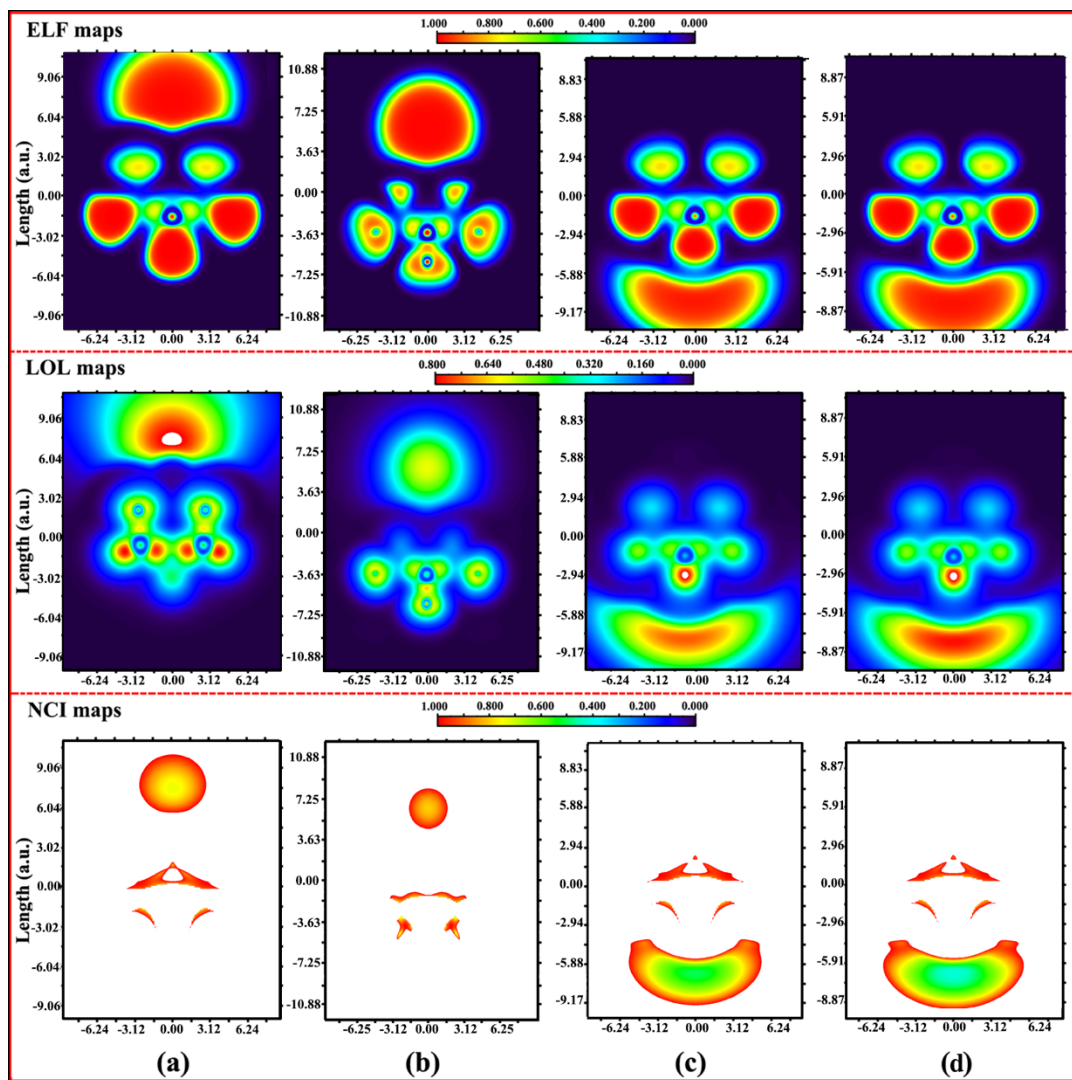

**Fig. S2.** ELF, LOL, and NCI maps for Li-F<sub>6</sub>C<sub>6</sub>H<sub>6</sub> optimized in presence of OEEF. (a) for **4** ( $F_z = -0.0050$ ), (b) for **1** ( $F_z = 0$ ), (c) for **2** ( $F_z = 0.0050$ ), (d) for **3** ( $F_z = 0.0080$ ).

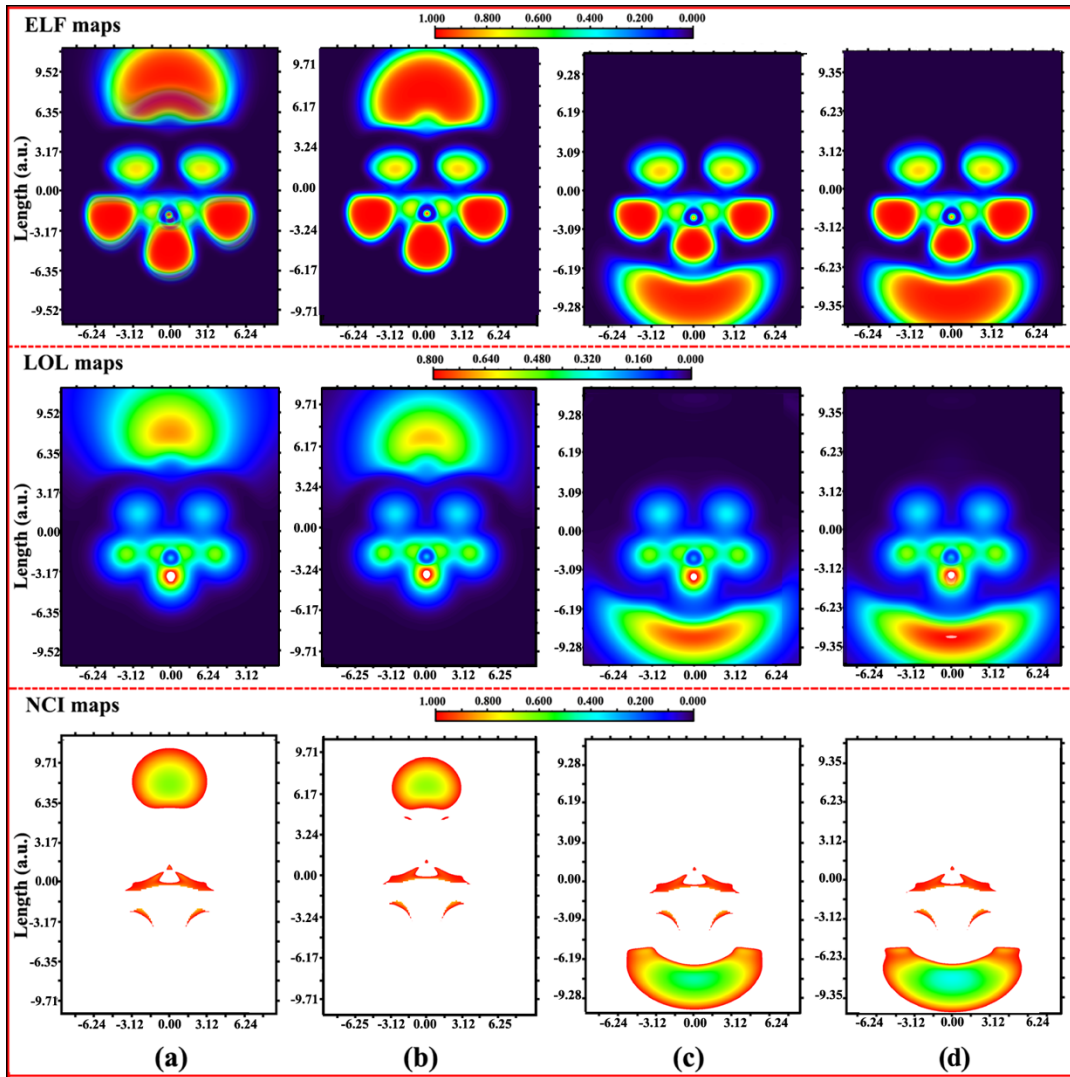

**Fig. S3.** ELF, LOL, and NCI maps for Na-F<sub>6</sub>C<sub>6</sub>H<sub>6</sub> optimized in presence of OEEF. (a) for **4** ( $F_z = -0.0050$ ), (b) for **1** ( $F_z = 0$ ), (c) for **2** ( $F_z = 0.0035$ ), (d) for **3** ( $F_z = 0.0070$ ).

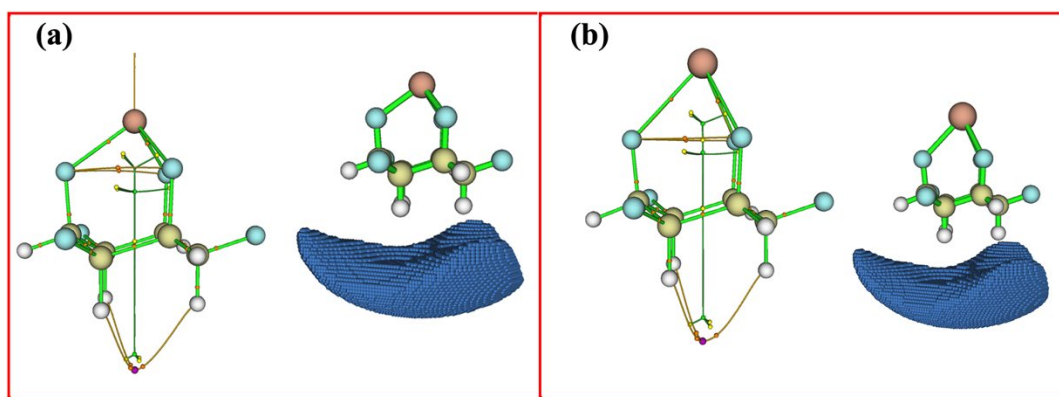

**Fig. S4.** QTAIM topological analysis and corresponding basin representations of Li-F<sub>6</sub>C<sub>6</sub>H<sub>6</sub>⋯e<sup>-</sup> (a,  $F_z = 0.0080$ ) and Na-F<sub>6</sub>C<sub>6</sub>H<sub>6</sub> (b,  $F_z = 0.0070$  a. u.).
